# Supplementary material for: Cation Exchange Properties of Subsurface Soil in Mid-Subtropical China: Variations, Correlation with Soil-Forming Factors, and Prediction
Source: MDPI journal article supplement (doi:10.3390/agronomy13030741), 2023-03-01
Supplement: s1 [file s1]

## Supplementary Materials

**Table S1.** Fundamental information about study sites and soil classification

| Profile | Horizons†              | longitude | latitude | Altitude<br>m | Terrain‡ | Parent<br>rock/<br>material      | Vegetation<br>type¶ | Chinese Soil Taxonomy<br>(Soil subgroup) | Soil Taxonomy<br>(Soil subgroup) | World Reference Base for Soil Resources<br>(Second Level) |
|---------|------------------------|-----------|----------|---------------|----------|----------------------------------|---------------------|------------------------------------------|----------------------------------|-----------------------------------------------------------|
| CS18    | Ah-Bt-BC-C             | 113.325   | 28.551   | 100           | LH-LS    | Granite                          | SH                  | Typic Argi-Udic Ferrosols                | Typic Paleudults                 | Hyperdystric Chromic Sideralic Cambisols                  |
| CZ06    | Ah-Bw-BC-C             | 113.682   | 26.187   | 350           | HH-MS    |                                  | SH                  | Red Ferri-Udic Cambosols                 | Typic Dystrudepts                | Dystric Cambisols                                         |
| HY07    | Ah-Bw1-Bw2-Bw3-Bw4     | 112.799   | 27.312   | 81            | LH-LS    |                                  | SH                  | Typic Hapli-Udic Ferrosols               | Oxic Dystrudepts                 | Hyperdystric Sideralic Cambisols                          |
| LY03    | Ah-Bt1-Bt2-Bt4         | 114.016   | 28.451   | 179           | LM-MS    |                                  | AR                  | Typic Argi-Udic Ferrosols                | Typic Paleudults                 | Chromic Acrisols                                          |
| LY04    | Ah-Bt-C                | 114.055   | 28.425   | 482           | LM-LS    |                                  | M-F                 | Typic Ali-Udic Argosols                  | Typic Paleudults                 | Chromic Alisols                                           |
| LY21    | Ah-BC-C                | 114.067   | 28.428   | 650           | LM-MS    |                                  | M-F                 | Xanthic Ali-Udic Cambosols               | Typic Dystrudepts                | Hyperdystric Cambisols                                    |
| SY08    | Ah-Bw1-Bw2-Bw3-Bw4     | 110.946   | 27.418   | 416           | HH-LS    |                                  | SH                  | Xanthic Hapli-Udic Ferrosols             | Oxic Dystrudepts                 | Hyperdystric Sideralic Cambisols                          |
| XT02    | Ah-Bt1-Bt2-Bt3-C       | 112.317   | 27.815   | 89            | LH-LS    |                                  | SH                  | Typic Argi-Udic Ferrosols                | Typic Paleudults                 | Chromic Acrisols                                          |
| YY05    | Ah-Bt1-Bt2-BC-C        | 113.020   | 28.567   | 87            | LH-LS    |                                  | M-F                 | Typic Argi-Udic Ferrosols                | Typic Paleudults                 | Acric Umbrisols                                           |
| YY10    | Ah-Bw1-Bw2-BC          | 113.509   | 29.023   | 128           | LH-MS    |                                  | M-F                 | Typic Hapli-Udic Ferrosols               | Oxic Dystrudepts                 | Sideralic Chromic Cambisols                               |
| CD01    | Ah-Bw1-Bw2-Bw3         | 111.936   | 28.772   | 58            | LH-US    | Quaternary red<br>clays<br>(QRC) | M-F                 | Typic Ali-Udic Cambosols                 | Typic Dystrudepts                | Hyperdystric Chromic Cambisols                            |
| CD06    | Ah-Bw1-Bw2-Bw3         | 111.617   | 29.219   | 66            | LH-TS    |                                  | AR                  | Typic Ali-Udic Cambosols                 | Typic Humudepts                  | Cambic Umbrisols                                          |
| CS02    | Ah-Bt1-Bt2-Bs          | 113.166   | 28.205   | 63            | LH-MS    |                                  | SH                  | Typic Argi-Udic Ferrosols                | Typic Paleudults                 | Rhodic Ferric Acrisols                                    |
| CS11    | Ah-Apb-Bls-Blst1-Blst2 | 112.657   | 28.470   | 41            | LH-MS    |                                  | AR                  | Typic Ali-Udic Argosols                  | Typic Plinthudults               | Aric Plinthosols                                          |
| CS15    | Ah-Bw1-Bw2-Bw3-Bw4     | 113.499   | 28.306   | 109           | LH-LS    |                                  | AR                  | Rhodic Hapli-Udic Ferrosols              | Oxic Dystrudepts                 | Dystric Rhodic Sideralic Cambisols                        |
| XT03    | Ah-Bw-Bt1-Bt2          | 112.469   | 27.732   | 77            | LH-LS    |                                  | SH                  | Typic Ali-Udic Argosols                  | Typic Paleudults                 | Chromic Alisols                                           |
| YY04    | Ah-Bw-Bt1-Bt2-Bt3      | 113.055   | 28.742   | 69            | LH-US    |                                  | M-F                 | Plinthic Ali-Udic Cambosols              | Typic Dystrudepts                | Plinthofractic Plinthosols                                |
| YY06    | Ah-AB-Bw-Bs1-Bs2       | 112.928   | 28.637   | 56            | LH-LS    |                                  | M-F                 | Mottlic Ali-Udic Cambosols               | Typic Dystrudepts                | Dystric Chromic Cambisols                                 |
| YY07    | Ah-Bt-Blst1-Blst2      | 113.541   | 29.488   | 83            | LH-MS    |                                  | SH                  | Plinthic Ali-Udic Cambosols              | Typic Plinthudults               | Alic Umbric Plinthosols                                   |
| ZZ08    | Ah-Bw1-Bw2-Bw3         | 113.365   | 27.072   | 105           | LH-LS    |                                  | M-F                 | Typic Argi-Udic Ferrosols                | Typic Paleudults                 | Rhodic Acrisols                                           |
| CS16    | Ah-Bt-BC-C             | 113.487   | 28.220   | 126           | LH-MS    | Slate                            | SH                  | Typic Argi-Udic Ferrosols                | Typic Paleudults                 | Haplic Acrisols                                           |
| SY01    | Ah-AC                  | 110.516   | 27.105   | 379           | HH-TS    |                                  | M-F                 | Humic Ali-Udic Cambosols                 | Typic Humudepts                  | Cambic Umbrisols                                          |
| XT04    | Ah-AB-Bt-BC            | 112.498   | 27.958   | 107           | LH-MS    |                                  | M-F                 | Typic Argi-Udic Ferrosols                | Typic Paleudults                 | Dystric Chromic Sideralic Cambisols                       |
| XX03    | Ah-Bt1-Bt2-BC          | 109.919   | 29.281   | 421           | HH-BS    |                                  | M-F                 | Xanthic Ali-Udic Argosols                | Typic Paleudults                 | Haplic Alisols                                            |
| YIY02   | Ah-AC                  | 111.537   | 28.420   | 107           | LH-BS    |                                  | M-F                 | Lithic Usti-Orthic Primosols             | Lithic Ustorthents               | Dystric Lithic Leptosols                                  |
| YIY07   | Ah-Bw-BC-C             | 112.300   | 28.531   | 59            | LH-MS    |                                  | M-F                 | Typic Ali-Udic Cambosols                 | Typic Humudepts                  | Cambic Umbrisols                                          |

|       |                          |         |        |     |       |     |                              |                   |                                  |
|-------|--------------------------|---------|--------|-----|-------|-----|------------------------------|-------------------|----------------------------------|
| YY08  | Ah-Bw-BC                 | 113.264 | 29.490 | 48  | LH-MS | M-F | Typic Hapli-Udic Ferrosols   | Oxic Dystrudepts  | Hyperdystric Sideralic Cambisols |
| YY09  | Ah-Bw-C                  | 113.438 | 29.087 | 103 | LH-LS | SH  | Typic Ali-Udic Cambosols     | Typic Dystrudepts | Hyperdystric Chromic Cambisols   |
| YZ01  | Ah-Bt-C                  | 111.443 | 26.554 | 209 | HH-MS | SH  | Xanthic Ali-Udic Argosols    | Typic Paleudults  | Haplic Alisols                   |
| ZJ05  | Ah-AB-Bt-C               | 110.255 | 29.372 | 484 | HH-TS | M-F | Humic Ferri-Udic Argosols    | Typic Paleudults  | Haplic Luvisols                  |
| CZ03  | Ah-Bw-Ahb-Bwb-BCb        | 113.112 | 25.443 | 313 | HH-MS | M-F | Typic Ferri-Udic Cambosols   | Typic Dystrudepts | Dystric Cambisols                |
| CZ04  | Ah-Bt1-Bt2-Bt3           | 112.628 | 25.588 | 404 | HH-TS | M-F | Humic Ferri-Udic Argosols    | Ultic Hapludalfs  | Luvic Umbrisols                  |
| CZ05  | Ah-Bw-Bt1-Bt2            | 112.465 | 25.687 | 255 | HH-MS | M-F | Typic Argi-Udic Ferrosols    | Typic Paleudults  | Acric Umbrisols                  |
| SY04  | Ah-Bt-Bts-Btsx           | 110.341 | 26.434 | 462 | LM-LS | SH  | Red Ferri-Udic Argosols      | Typic Rhodudalfs  | Placic Rhodic Ferric Luvisols    |
| SY07  | Ah-Bs1-Bs2-Bs3           | 110.345 | 26.961 | 343 | LH-BS | M-F | Mottlic Hapli-Udic Ferrosols | Oxic Dystrudepts  | Dystric Sideralic Cambisols      |
| YZ03  | Ah-Bw-Bt1-Bt2-Bt3        | 111.646 | 25.393 | 201 | LH-BS | M-F | Typic Argi-Udic Ferrosols    | Typic Paleudults  | Acric Umbrisols                  |
| YZ06  | Ah-Bt-Bts-Bts1-Bts2-Bts3 | 112.153 | 25.588 | 290 | HH-MS | M-F | Mottlic Argi-Udic Ferrosols  | Aquic Paleudults  | Ferric Lixisols                  |
| YZ08  | Ah-Bts1-Bts2-Bts3        | 112.349 | 25.876 | 380 | HH-MS | SH  | Trunc Argi-Udic Ferrosols    | Typic Paleudults  | Chromic Ferric Acrisols          |
| ZJJ01 | Ah1-Ah2-Bs1-Bs2          | 111.251 | 29.560 | 124 | LH-LS | M-F | Typic Ferri-Udic Cambosols   | Typic Eutrudepts  | Eutric Cambisols                 |
| ZZ05  | Ah-Bt1-Bt2-Bt3           | 113.657 | 26.383 | 263 | LH-MS | M-F | Typic Argi-Udic Ferrosols    | Typic Paleudults  | Acric Umbrisols                  |
| CD02  | Ah1-Ah2-Bt-BC            | 111.233 | 29.666 | 197 | LH-MS | SH  | Typic Ferri-Udic Argosols    | Typic Paleudults  | Alic Umbrisols                   |
| CZ02  | Ah-Bw-BC                 | 113.457 | 25.773 | 606 | LM-MS | SH  | Typic Ferri-Udic Cambosols   | Typic Dystrudepts | Dystric Cambisols                |
| SY03  | Ah-AB-Bw-BC              | 110.079 | 26.670 | 317 | LH-MS | M-F | Typic Hapli-Udic Ferrosols   | Oxic Dystrudepts  | Cambic Umbrisols                 |
| SY06  | Ah-Bw-BC                 | 110.726 | 26.472 | 375 | LH-MS | AR  | Typic Ali-Udic Cambosols     | Typic Dystrudepts | Hyperdystric Cambisols           |
| XT05  | Ah-Bw-BC1-BC2            | 112.694 | 27.744 | 59  | LH-BS | M-F | Typic Ali-Udic Cambosols     | Typic Dystrudepts | Dystric Chromic Cambisols        |
| YIY01 | Ah-AB-Bw-C               | 111.263 | 28.312 | 226 | LH-BS | M-F | Typic Ferri-Udic Cambosols   | Typic Dystrudepts | Eutric Cambisols                 |
| YZ02  | Ah-Bw1-Bw2-BC            | 111.754 | 26.098 | 238 | LH-US | SH  | Typic Ali-Udic Cambosols     | Typic Dystrudepts | Hyperdystric Chromic Cambisols   |
| YZ04  | Ah-AC-C                  | 111.182 | 25.356 | 216 | LH-MS | AR  | Typic Usti-Orthic Primosols  | Typic Udorthents  | Dystric Leptosols                |
| YZ07  | Ah-Bw-BC                 | 112.347 | 25.420 | 309 | HH-MS | M-F | Typic Ali-Udic Cambosols     | Typic Dystrudepts | Hyperdystric Cambisols           |
| ZZ06  | Ah-AB-Bw1-Bw2-Bw3        | 113.656 | 26.517 | 190 | LH-BS | SH  | Typic Ali-Udic Cambosols     | Typic Dystrudepts | Hyperdystric Cambisols           |

† h: illuvial organic matter accumulation; t: illuvial accumulation of silicate clay; w: weak color or structure within B; s: illuvial accumulation of ferric oxide; l: plinthite; x: fragipan characteristics; b: buried genetic horizon

‡ LH-TS: Low Hill-Top of slope; LH-US: Low Hill-Upslope; LH-MS: Low Hill-Mesoslope; LH-LS: Low Hill-Lower Slope; LH-BS: Low Hill-Bottom slopes; HH-US: High Hill-Upslope; HH-MS: High Hill-Mesoslope; HH-LS: High Hill-Lower Slope; HH-BS: High Hill-Bottom slopes; LM-MS: Low Mountain-Mesoslope; LM-LS: Low Mountain-Lower Slope

¶ AR: Arable; M-F: Mixed-forest; SH: Shrub

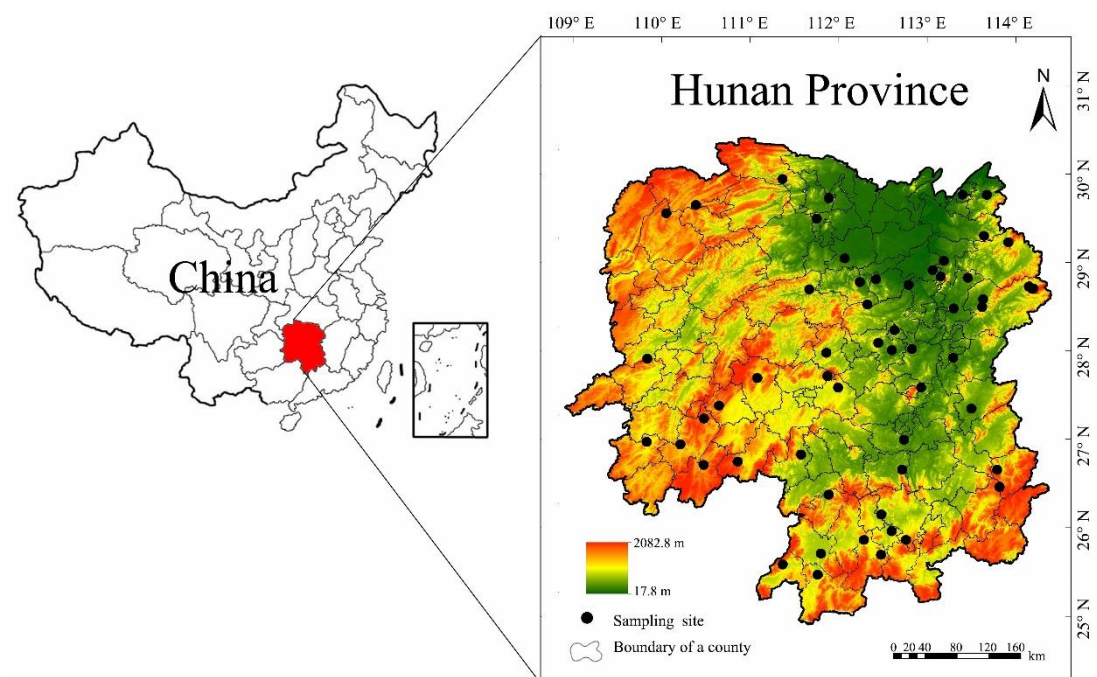

**Figure S1.** The study area and geographic distribution of sampling sites

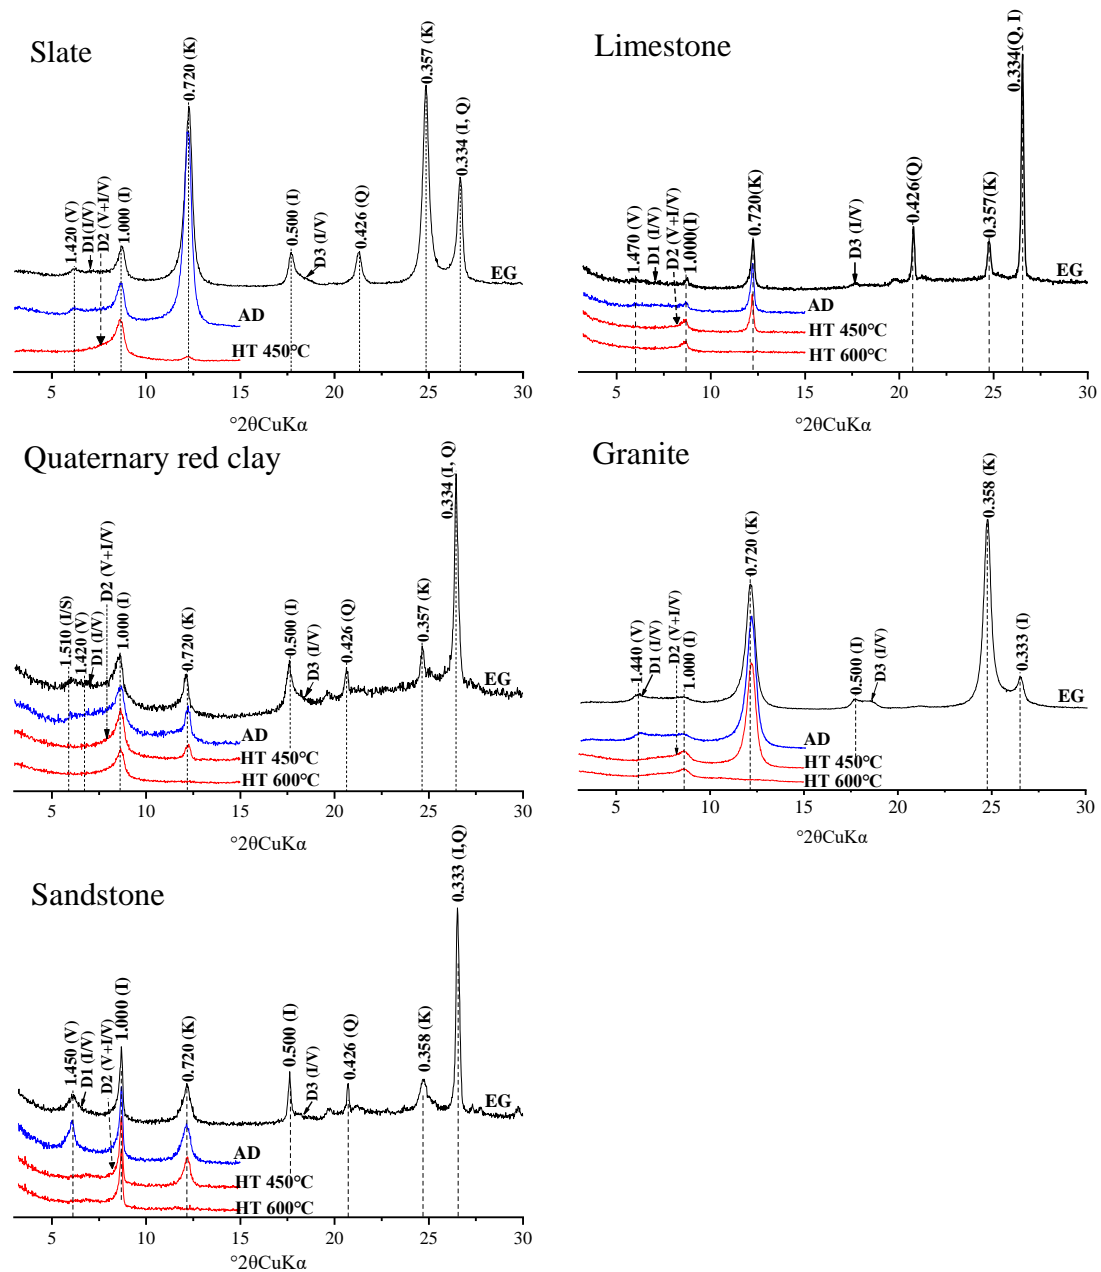

**Figure S2.** X-ray diffraction patterns of the representative upland soil profiles derived from different parent materials (K: kaolinite; I: illite; V: vermiculite; I/S: illite/smectite mixed-layer mineral; I/V: illite/vermiculite mixed-layer mineral; Q: quartz; AD: air-dried sample; EG: ethylene-glycol saturated sample; HT 450°C: sample heated at 450°C; HT 600°C: sample heated at 600°C)

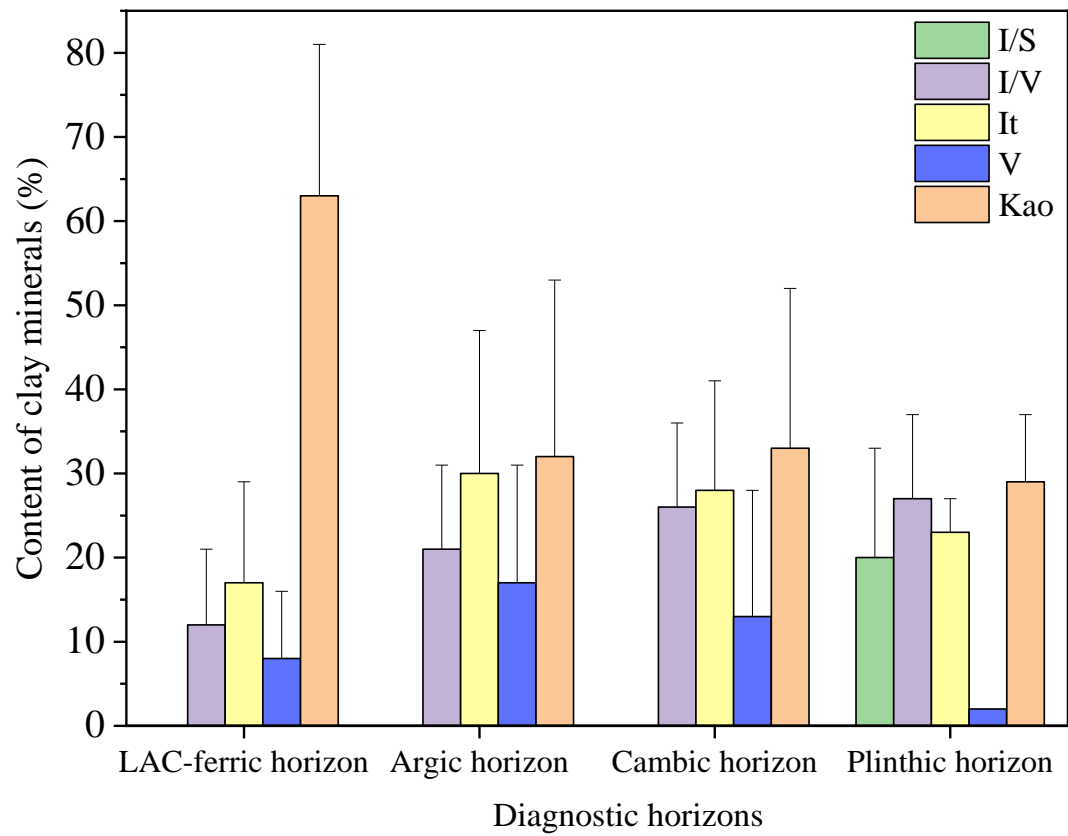

**Figure S3.** Relative content of clay minerals of different diagnostic horizons (Kao: kaolinite; It: illite; V: vermiculite; I/S: illite/smectite mixed-layer mineral; I/V: illite/vermiculite mixed-layer mineral)

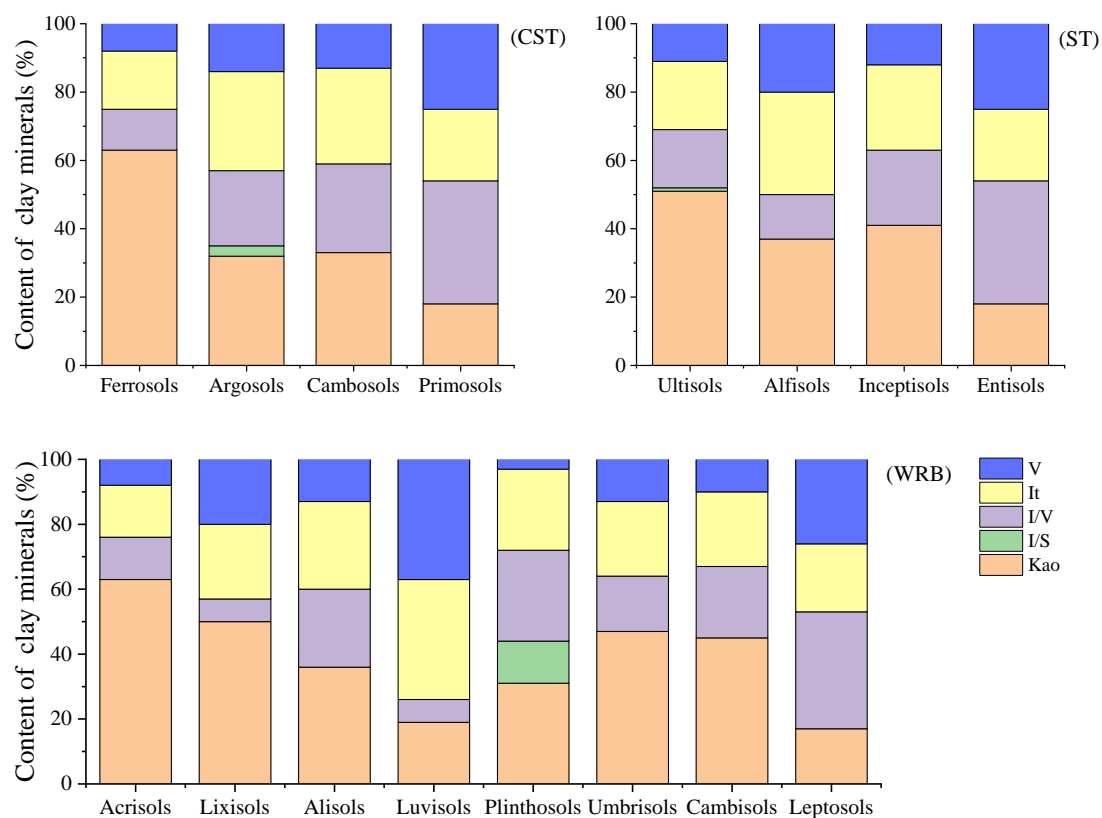

**Figure S4.** Relative contents of clay minerals of different soil types (i.e., soil orders) (Kao: kaolinite; It: illite; V: vermiculite; I/S: illite/smectite mixed-layer mineral; I/V: illite/vermiculite mixed-layer mineral; CST: Chinese Soil Taxonomy; ST: Soil Taxonomy; WRB: World Reference Base for Soil Resources)
